# Supplementary material
Source: PubMed Central journal article supplement (PMC3530845)

**S1**

Percent dnPAK1 Signal Strength  
Compared to Vector Infection

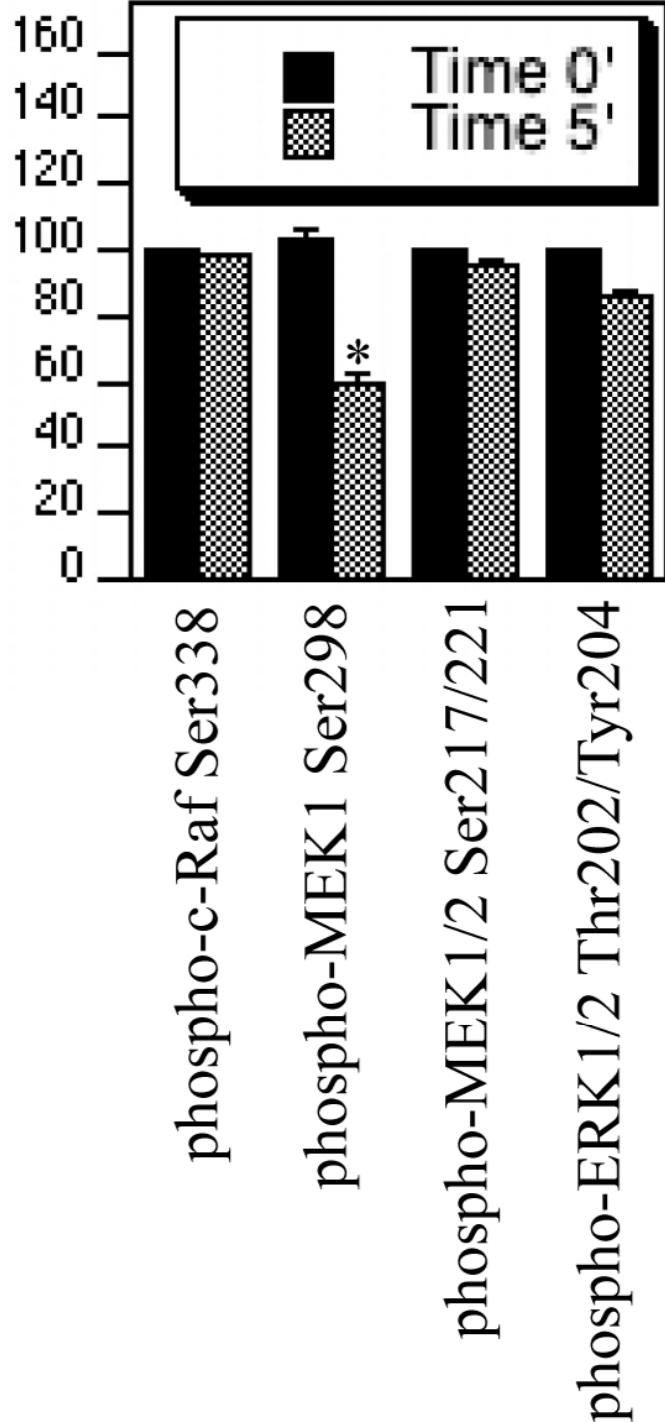**S2**

Percent dnRAF Signal Strength  
Compared to Vector Infection

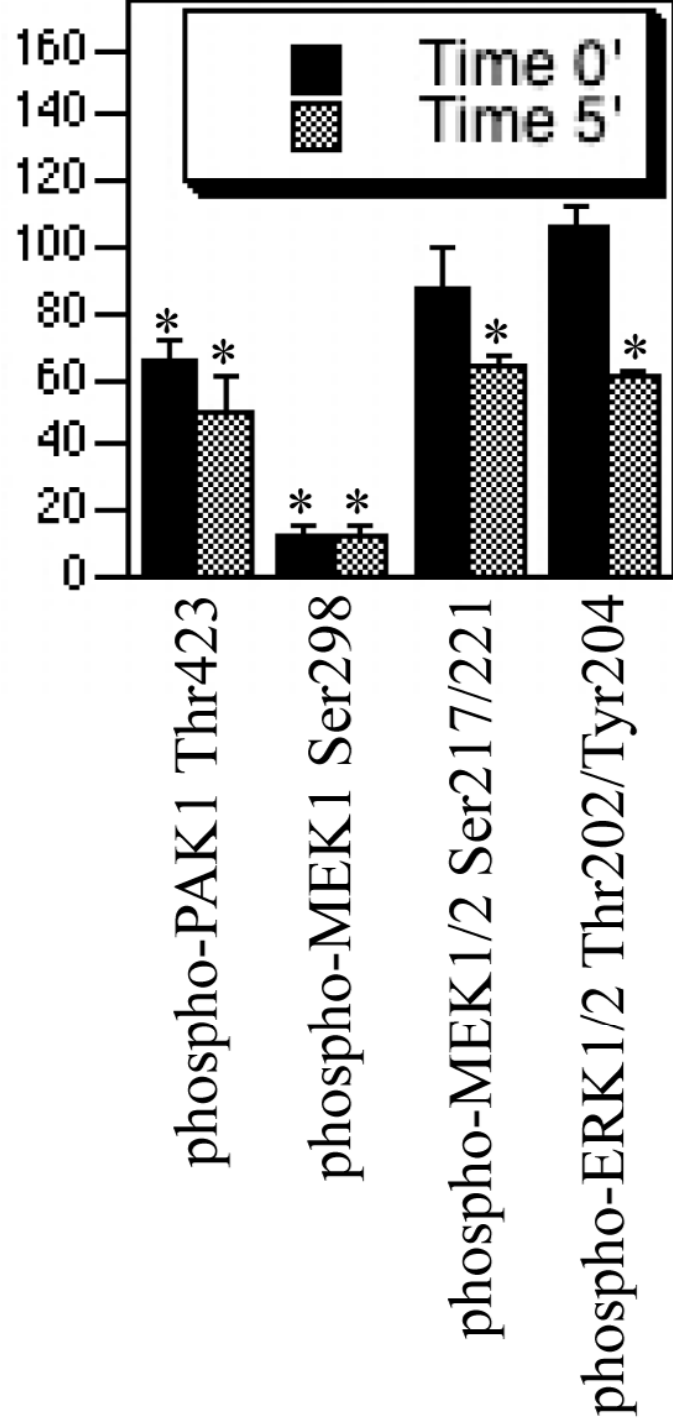

Supplement: NIHMS427831-supplement-Supp_Fig_1.pdf [file NIHMS427831-supplement-Supp_Fig_1.pdf]
