# Supplementary material
Source: PubMed Central journal article supplement (PMC3530845)

**S1**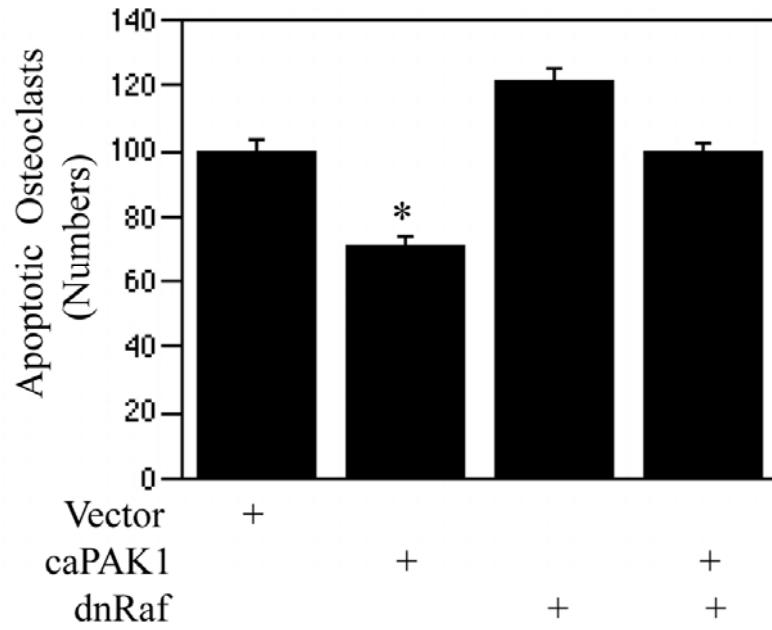**S2**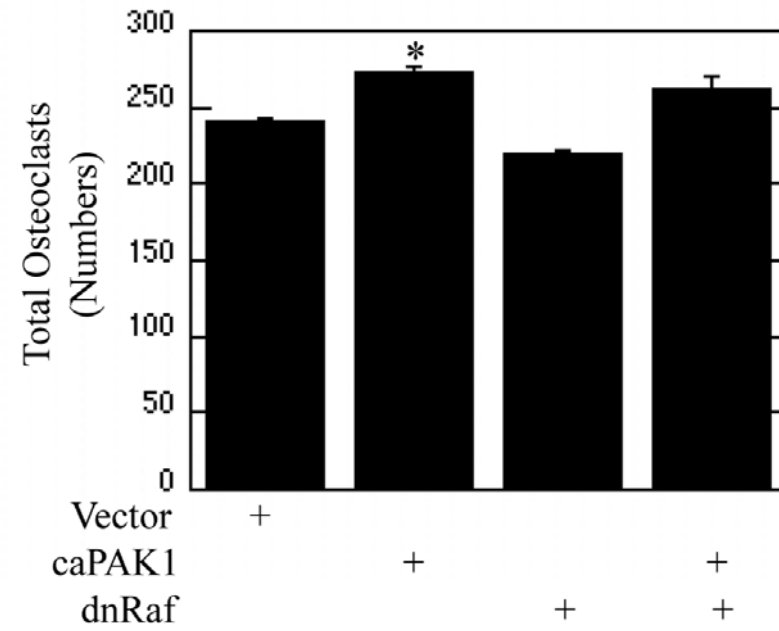**S3**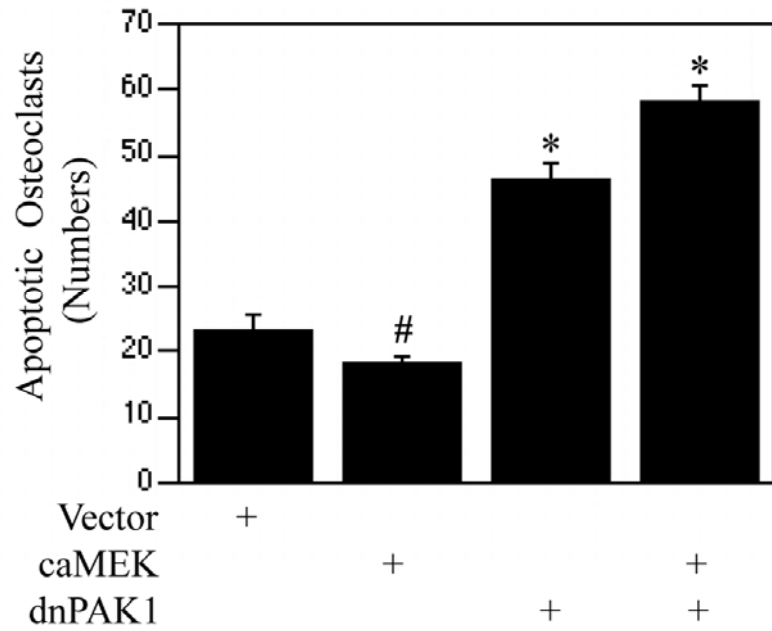**S4**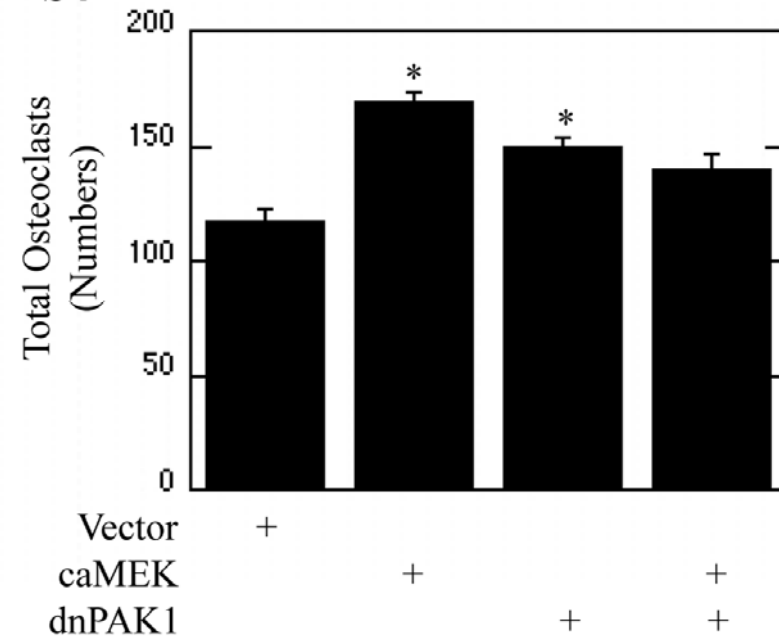

Supplement: NIHMS427831-supplement-Supp_Fig_2.pdf [file NIHMS427831-supplement-Supp_Fig_2.pdf]
